# Supplementary material for: Tungsten-based nanoparticles as contrast agents for liver tumor detection using dual-energy computed tomography
Source: Royal Society of Chemistry journal article supplement (doi:10.1039/d3bm01068f), 2023-01-01
Supplement: d3bm01068f1.pdf [file d3bm01068f1.pdf]

## Supporting Information

### **Tungsten-Based Nanoparticles as Contrast Agents for Liver Tumor Detection Using Dual-Energy Computed Tomography**

Xiuru Ji,<sup>a,#</sup> Lan Zhu,<sup>b,#</sup> Jessica C. Hsu,<sup>c</sup> Han Wang,<sup>a</sup> Jingwei Zhou,<sup>d</sup> Qingbing Wang<sup>b</sup>,  
Yuhan Li,<sup>a</sup> Weibo Cai,<sup>\*c</sup> Dalong Ni,<sup>\*a</sup> and Zhiyuan Wu<sup>\*b</sup>

<sup>a</sup> Department of Orthopaedics, Shanghai Key Laboratory for Prevention and Treatment of Bone and Joint Diseases, Shanghai Institute of Traumatology and Orthopaedics, Ruijin Hospital, Shanghai Jiao Tong University School of Medicine, No. 197, Ruijin 2<sup>nd</sup> Rd, Shanghai 200025, P. R. China

<sup>b</sup> Department of Radiology, Ruijin Hospital, Shanghai Jiao Tong University School of Medicine Shanghai 200025, P. R. China

<sup>c</sup> Departments of Radiology and Medical Physics, University of Wisconsin-Madison, Wisconsin 53705, United States

<sup>d</sup> Department of Plastic and Reconstructive Surgery, Shanghai Ninth People's Hospital, Shanghai Jiao Tong University School of Medicine, Shanghai, People's Republic of China. No. 639, Zhizaoju Rd., Huangpu District, Shanghai 200011, China

<sup>#</sup>These authors contributed equally.

<sup>\*</sup>Corresponding authors: [dalongni@sjtu.edu.cn](mailto:dalongni@sjtu.edu.cn) or [ndl12353@rjh.com.cn](mailto:ndl12353@rjh.com.cn) (D. Ni); [WCai@uwhealth.org](mailto:WCai@uwhealth.org) (W. Cai); [wuzhiyuan@shsmu.edu.cn](mailto:wuzhiyuan@shsmu.edu.cn) (Z. Wu)

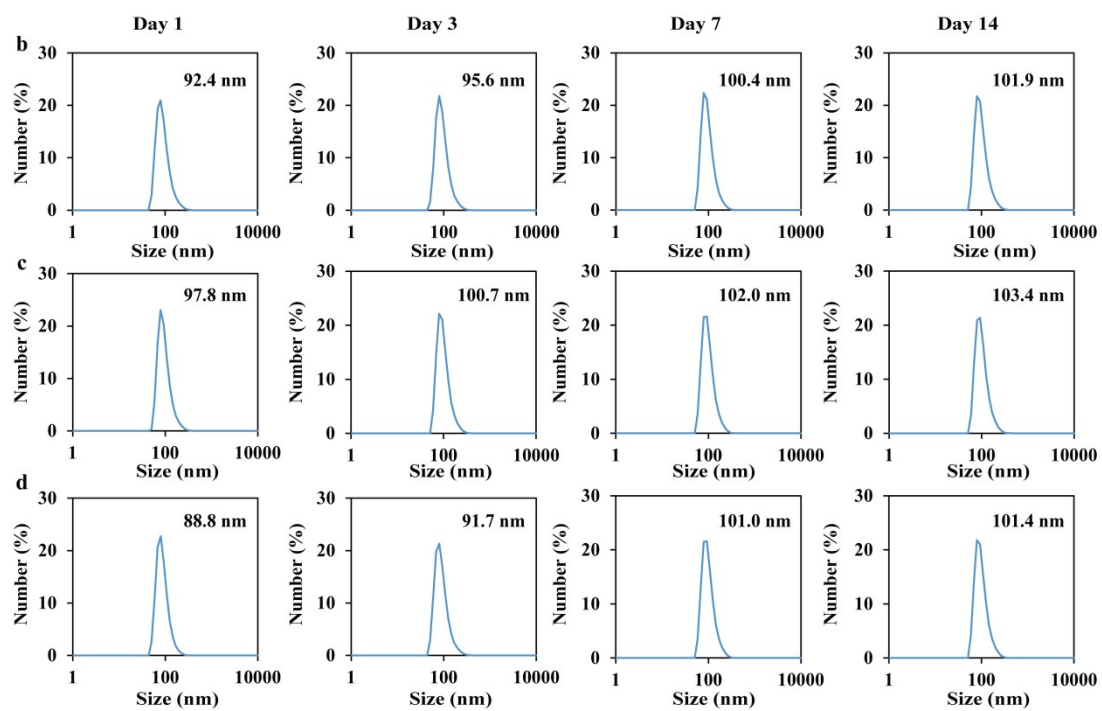

Fig. S1. Size of  $\text{WO}_{3-x}$  NPs at different time points in water (a), saline (b), PBS buffer (c), and serum (d).

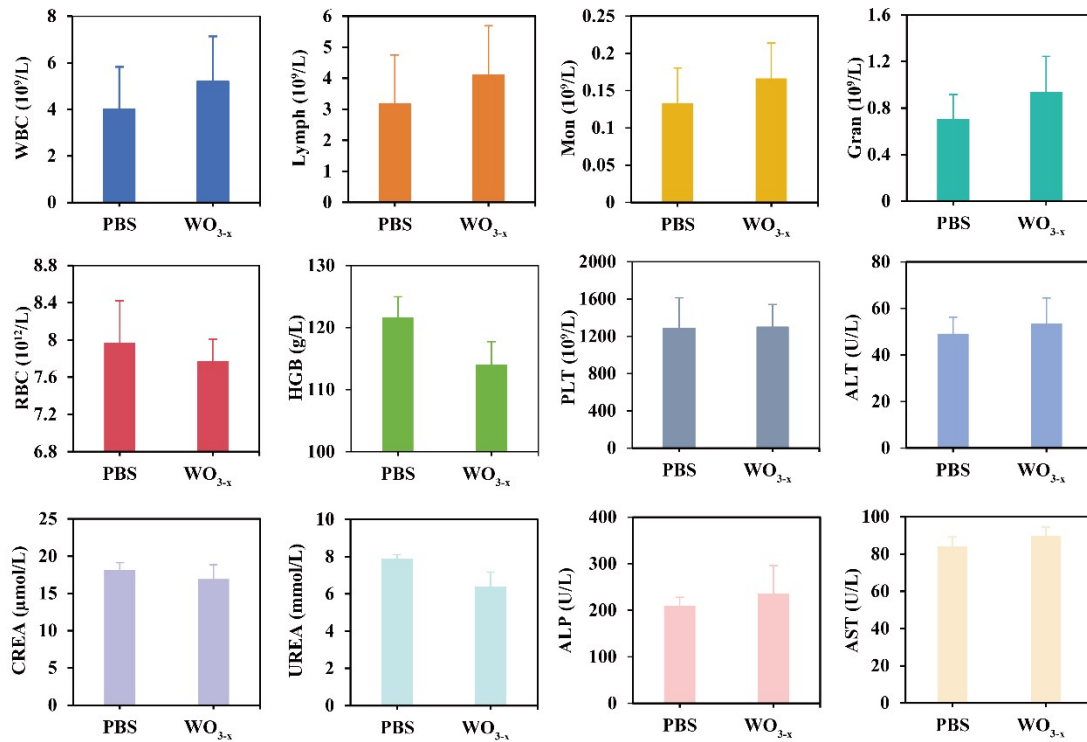

Fig. S2. Blood routine after 14 days treatment with PBS or WO<sub>3-x</sub> NPs (WBC: white blood cell; Lymph: lymphocyte; Mon: monocyte; Gran: granulocyte; RBC: red blood cell; HGB: hemoglobin; PLT: platelet; Liver-related biochemical indexes: ALT: alanine aminotransferase; ALP: alkaline phosphatase; AST: aspartate aminotransferase; Kidney-related biochemical indexes: CREA: creatinine; Urea: urea).
